# Supplementary material for: Unusual nanoscale piezoelectricity-driven high current generation from a self S-defect-neutralised few-layered MoS2 nanosheet-based flexible nanogenerator
Source: Royal Society of Chemistry journal article supplement (doi:10.1039/d2nr02347d), 2022-01-01
Supplement: d2nr02347d1.pdf [file d2nr02347d1.pdf]

## Supporting Information

# Unusual nanoscale piezoelectricity driven high current generation from self S-defect neutralised few layered MoS<sub>2</sub> nanosheets based flexible nanogenerator

Charu Sharma<sup>a,b</sup>, Avanish Kumar Srivastava<sup>a,b</sup>, Manoj Kumar Gupta<sup>a,b\*</sup>

*<sup>a</sup>CSIR-Advanced Materials and Processes Research Institute, Bhopal, Madhya Pradesh  
462026, India*

*<sup>b</sup>Academy of Scientific and Innovative Research (AcSIR), Ghaziabad- 201002, India*

\*Corresponding author Fax: +91 755-2457042; +9199777360351 (mobile).

E-mail address: [mkgupta@ampri.res.in](mailto:mkgupta@ampri.res.in), [manojampri@gmail.com](mailto:manojampri@gmail.com) (Manoj Kumar Gupta)

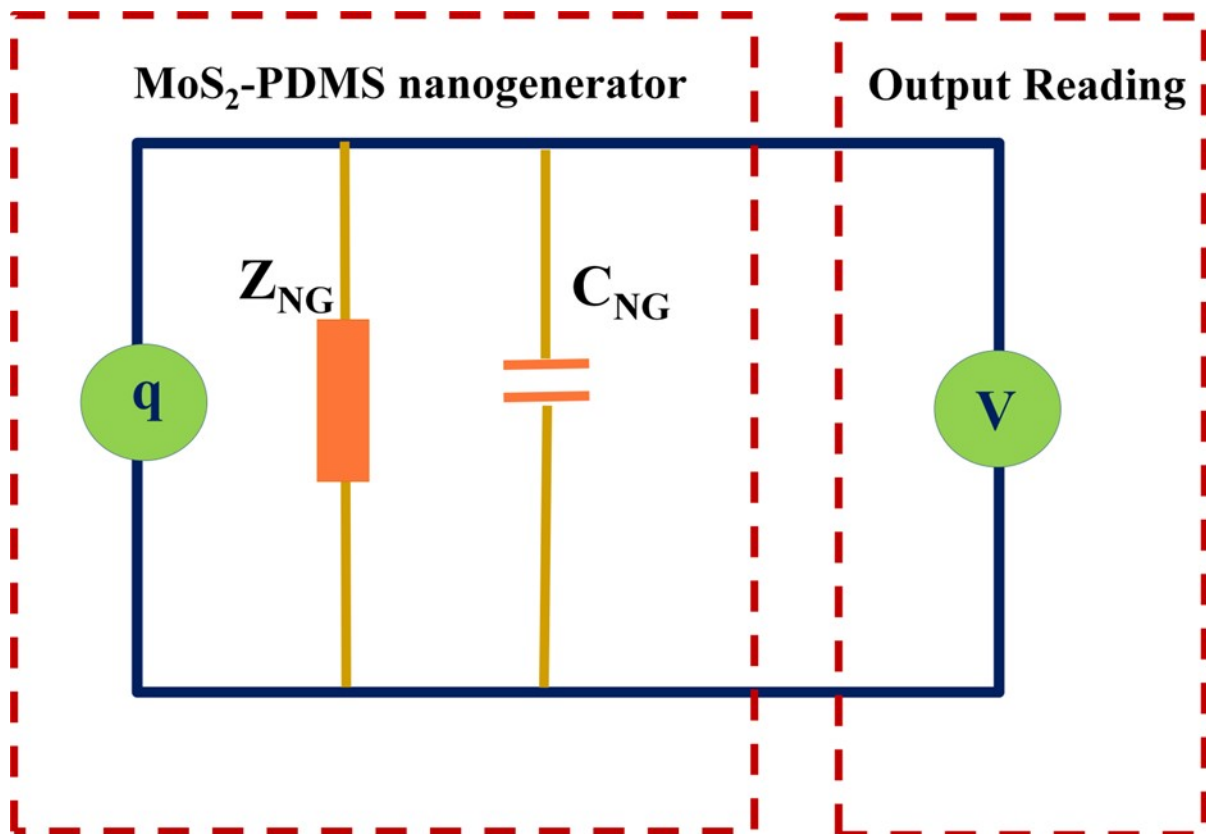

**Figure S1.** Equivalent-circuit diagram of MoS<sub>2</sub>-PDMS nanocomposite based piezoelectric nanogenerator device.

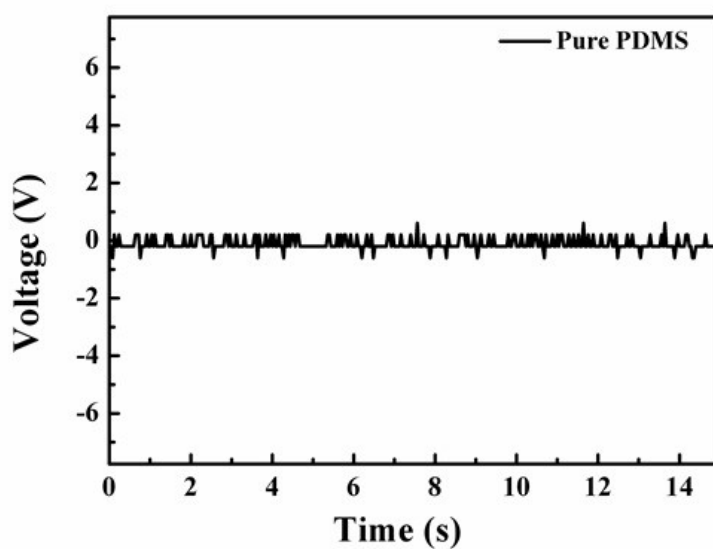

**Figure S2.** Output voltage obtained from pristine PDMS based nanogenerator under same vertical compressive force.

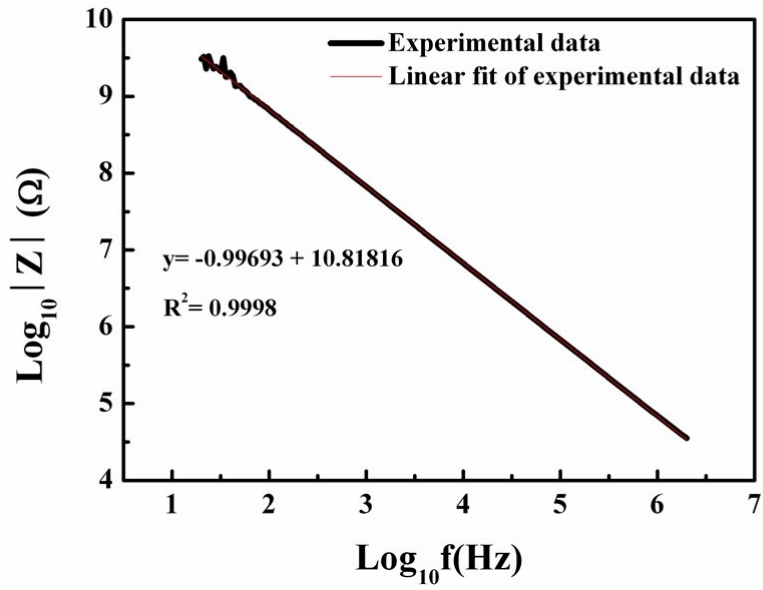

**Figure S3.** Impedance-frequency curve of the MoS<sub>2</sub>-PDMS based nanocomposite based nanogenerator

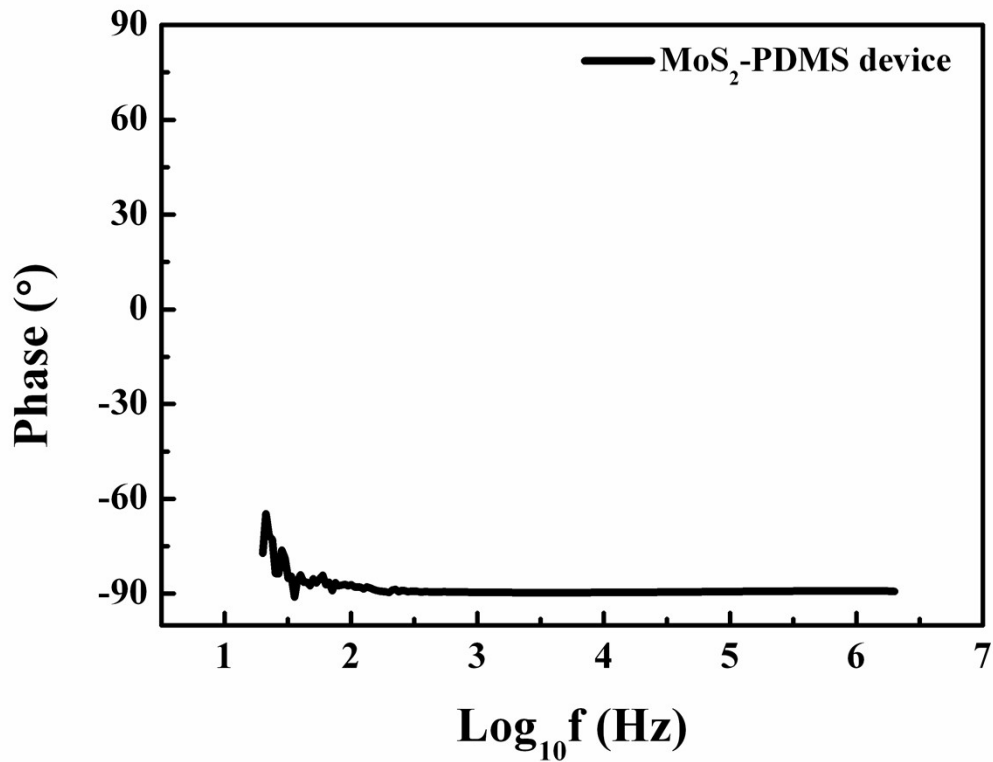

**Figure S4.** Variation of phase (theta) with applied frequency of the nanogenerator device.

### Energy conversion efficiency.

The performance of the piezoelectric nanogenerator with  $d_{33}$  and dielectric constant is related to the piezoelectric voltage constant ( $g_{33}$ ) by following equation

$$V = g_{33} \epsilon E, \quad (1)$$

where  $E$  is Young's modulus of material and  $\epsilon$  is the strain. Also, the  $d_{33}$  is directly proportional to  $g_{33}$  and mathematically the can be expressed as

$$g_{33} = \frac{d_{33}}{\epsilon_0 K} \quad (2)$$

Where,  $\epsilon_0$  is free space permittivity and  $K$  is the relative dielectric constant of MoS<sub>2</sub> nanosheets based device. Eq.(2) clearly indicates the enhancement in piezoelectric output voltage is due to the high  $d_{33}$ , moreover the high  $d_{33}$  is due to the high electric polarisation cause by high with dielectric constant of the MoS<sub>2</sub> nanosheets. It is worth to point out that low dielectric constant of MoS<sub>2</sub>-PDMS nanogenerator device is due to the low value of dielectric constant of PDMS (2.5). The average efficiency of energy conversion estimated by dividing output electrical energy ( $15.4 \times 10^{-6}$ ) with strain energy ( $0.512 \times 10^{-6}$ J).<sup>1-2</sup> The efficiency of the few layered flexible MoS<sub>2</sub> based nanogenerator device was calculated and found to be 30.07%.

### References

1. C. Chang, V. H. Tran, J. Wang, Y-K Fuh and L. Lin, *Nano Lett.*, 2010, **10**, 726-731.
2. H. Li, C. Tian, Z.D. Deng, *Appl. Phy. Rev.*, 2014, **1**, 041301.
